# Supplementary material
Source: PubMed Central journal article supplement (PMC5961932)
Supplement: NIHMS76848-supplement-Supplementary_figures.pdf [file NIHMS76848-supplement-Supplementary_figures.pdf]

## Supplementary Data

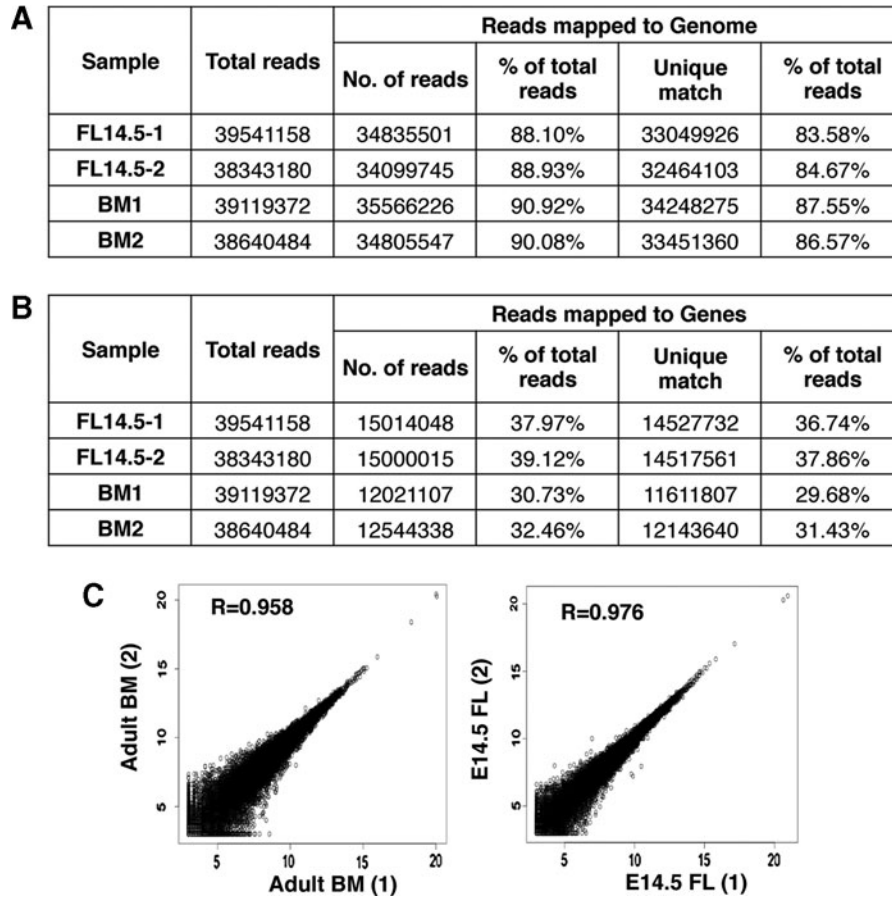

**SUPPLEMENTARY FIG. S1.** Mapping statistics and correlation analysis after RNA-Seq for LT-HSC from murine FLs and BM. **(A)** Percentages of reads mapped to reference genome after RNA-seq analysis performed on murine FL E14.5 and ABM LT-HSCs. **(B)** A percentage of reads mapped to genes after RNA-seq analysis performed on FL E14.5 and ABM LT-HSCs. **(C)** The correlation coefficients between replicates of different samples derived from FL E14.5 and ABM LT-HSCs. ABM, adult bone marrow; FL, fetal liver; LT-HSC, long-term hematopoietic stem cell.

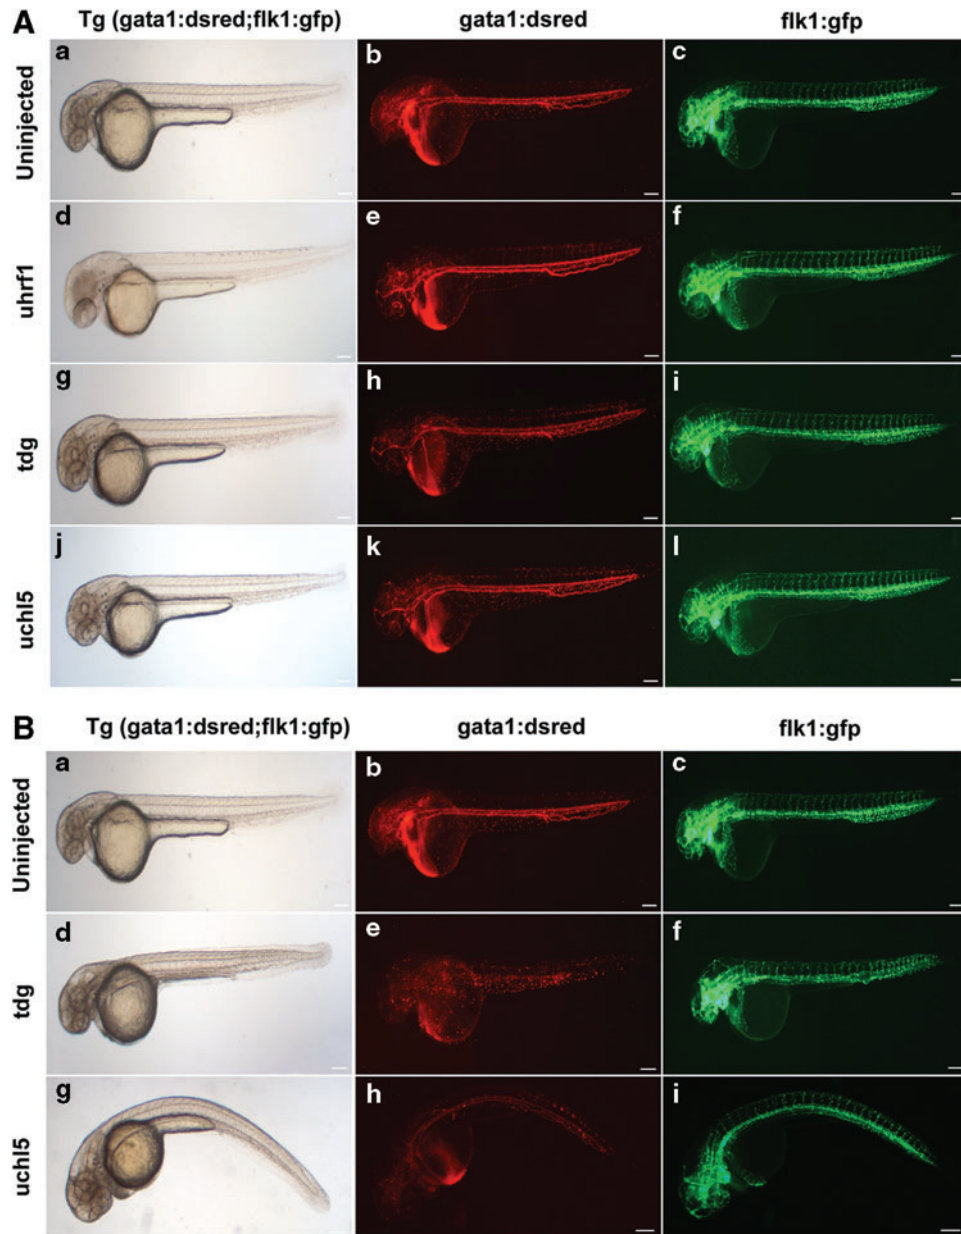

**SUPPLEMENTARY FIG. S2.** Morpholino knockdown of target genes in Tg:gata1;DsRed/flk1;EGFP zebrafish line. **(A)** Representative fluorescence images of embryos (48hpf): **(a–c)** uninjected control; after injection of 5 bp mismatch control MOs against *uhrf1* **(d–f)**, *tdg* **(g–i)**, and *uchl5* **(j–l)**. **(B)** Representative fluorescence images of embryos (48hpf): **(a–c)** uninjected control; after injection of splice-blocking MOs against *tdg* **(d–f)** and *uchl5* **(g–i)**. MOs, morpholino antisense oligonucleotides.

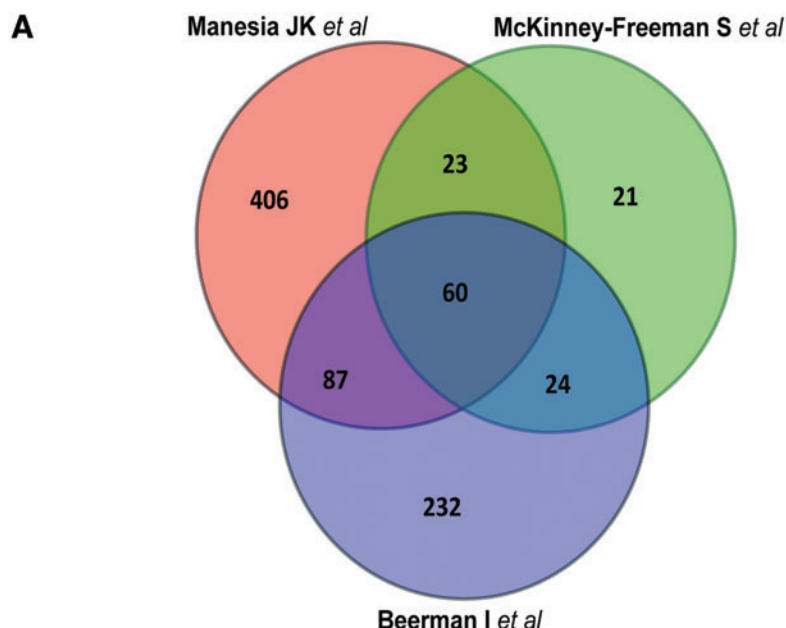

**B**

| Overlapping of differential expressed genes (DEG) |                         |                        |         |
|---------------------------------------------------|-------------------------|------------------------|---------|
|                                                   | Manesia JK <i>et al</i> | McKinney-Freeman S     | Overlap |
| No. of DEG                                        | 576                     | 128                    | 83      |
|                                                   | Manesia J <i>et al</i>  | Beerman I <i>et al</i> | Overlap |
| No. of DEG                                        | 576                     | 403                    | 147     |

Threshold: Log2FC  $\geq 2$ , FDR  $\leq 0.05$

**C**

| HSC source | Population | Cell surface phenotype              | Reference                              | Accession NO. |
|------------|------------|-------------------------------------|----------------------------------------|---------------|
| Adult BM   | LT-HSC     | Lin-Sca-1+c-kit+CD150+CD34-         | McKinney-Freeman S <i>et al</i> , 2012 | GSE37000      |
| FL E14.5   | LT-HSC     | Lin-Sca-1+c-kit+CD150+CD48-         |                                        |               |
| Adult BM   | LT-HSC     | Lin-Sca-1+c-kit+ CD34- Flk2- Il7ra- | Beerman I <i>et al</i> , 2014          | GSE55525      |
| FL E14.5   | FL HSC     | Lin-Sca-1+c-kit+ CD150+CD48-        |                                        |               |

**SUPPLEMENTARY FIG. S3.** Cross comparison of RNA-seq with published microarray dataset. **(A)** Comparison of differentially expressed genes in this study with results from McKinney-Freeman *et al.* [6] and Beerman *et al.* [33]. Venn diagram depicting the overlap of differentially regulated genes in these three independent studies. Threshold used is: Log2FC  $\geq 2$ , false discovery rate  $\leq 0.05$ . **(B)** Comparison of differentially expressed genes in this study with results from McKinney-Freeman *et al.* [6] and Beerman *et al.* [33]. Depicted is the number of genes differentially expressed between FL E14.5 and BM in the three independent studies and overlap estimated after cross comparison of differential gene expression. **(C)** Description of cell surface markers used for purification of LT-HSC from E14.5 FL and ABM in McKinney-Freeman *et al.* [6] and Beerman *et al.* [33].
